# Supplementary material for: Effects of Group Exercise Intervention on Quality of Life and Physical Parameters in Patients with Childhood Cancer: A Systematic Review
Source: MDPI journal article supplement (doi:10.3390/curroncol31020077), 2024-02-15
Supplement: s1 [file s1]

**Supplementary Table S1** Terms used in the search performed on September 27, 2023

|     |                                                                                                                         |     |                                          |     |                                                                                                                                                                                                                                                                                                 |
|-----|-------------------------------------------------------------------------------------------------------------------------|-----|------------------------------------------|-----|-------------------------------------------------------------------------------------------------------------------------------------------------------------------------------------------------------------------------------------------------------------------------------------------------|
| #1  | "adolescent"[MeSH Terms]                                                                                                | #26 | "cancer"[Title/Abstract]                 | #53 | "retinoblastom"[Title/Abstract]                                                                                                                                                                                                                                                                 |
| #2  | "child"[MeSH Terms]                                                                                                     | #27 | "malignan"[Title/Abstract]               | #54 | "meningioma"[Title/Abstract]                                                                                                                                                                                                                                                                    |
| #3  | "schoolchild"[Title/Abstract]                                                                                           | #28 | "hemato-oncologic"[Title/Abstract]       | #55 | "glioma"[Title/Abstract]                                                                                                                                                                                                                                                                        |
| #4  | "kid"[Title/Abstract]                                                                                                   | #29 | "hematolo"[Title/Abstract]               | #56 | "Brain Neoplasms"[Title/Abstract]                                                                                                                                                                                                                                                               |
| #5  | "kids"[Title/Abstract]                                                                                                  | #30 | "haemato-oncologic"[Title/Abstract]      | #57 | "Brain Tumor"[Title/Abstract]                                                                                                                                                                                                                                                                   |
| #6  | "adoles"[Title/Abstract]                                                                                                | #31 | "haematolo"[Title/Abstract]              | #58 | "Brain Cancer"[Title/Abstract]                                                                                                                                                                                                                                                                  |
| #7  | "teen"[Title/Abstract]                                                                                                  | #32 | "bone marrow transplant"[Title/Abstract] | #59 | #20 or #21 or #22 or #23 or #24 or #25<br>or #26 or #27 or #28 or #29 or #30 or<br>#31 or #32 or #33 or #34 or #35 or #36<br>or #37 or #38 or #39 or #40 or #41 or<br>#42 or #43 or #44 or #45 or #46 or #47<br>or #48 or #49 or #50 or #51 or #52 or<br>#53 or #54 or #55 or #56 or #57 or #58 |
| #8  | "boy"[Title/Abstract]                                                                                                   | #33 | "leukemia"[Title/Abstract]               |     |                                                                                                                                                                                                                                                                                                 |
| #9  | "girl"[Title/Abstract]                                                                                                  | #34 | "leukaemia"[Title/Abstract]              |     |                                                                                                                                                                                                                                                                                                 |
| #10 | "minor"[Title/Abstract]                                                                                                 | #35 | "AML"[Title/Abstract]                    |     |                                                                                                                                                                                                                                                                                                 |
| #11 | "youth"[Title/Abstract]                                                                                                 | #36 | "lymphoma"[Title/Abstract]               |     |                                                                                                                                                                                                                                                                                                 |
| #12 | "puberty"[Title/Abstract]                                                                                               | #37 | "hodgkin"[Title/Abstract]                |     |                                                                                                                                                                                                                                                                                                 |
| #13 | "pubescent"[Title/Abstract]                                                                                             | #38 | "T-cell"[Title/Abstract]                 |     | #60 "Physical Therapy Modalities"[MeSH<br>Terms]                                                                                                                                                                                                                                                |
| #14 | "prepuberty"[Title/Abstract]                                                                                            | #39 | "B-cell"[Title/Abstract]                 | #60 |                                                                                                                                                                                                                                                                                                 |
| #15 | "pediatric"[Title/Abstract]                                                                                             | #40 | "non-hodgkin"[Title/Abstract]            | #61 | "exercise"[MeSH Terms]                                                                                                                                                                                                                                                                          |
| #16 | "school"[Title/Abstract]                                                                                                | #41 | "sarcoma"[Title/Abstract]                | #62 | "exercises"[Title/Abstract]                                                                                                                                                                                                                                                                     |
| #17 | "preschool"[Title/Abstract]                                                                                             | #42 | "Ewing"[Title/Abstract]                  | #63 | "physical activities"[Title/Abstract]                                                                                                                                                                                                                                                           |
| #18 | "high school"[Title/Abstract]                                                                                           | #43 | "osteosarcoma"[Title/Abstract]           | #64 | "physical activity"[Title/Abstract]                                                                                                                                                                                                                                                             |
| #19 | #1 or #2 or #3 or #4 or #5 or #6 or #7 or<br>#8 or #9 or #10 or #11 or #12 or #13 or<br>#14 or #15 or #16 or #17 or #18 | #44 | "osteosarcoma"[Title/Abstract]           | #65 | "physical exercise"[Title/Abstract]                                                                                                                                                                                                                                                             |
|     |                                                                                                                         | #45 | "nephroblastoma"[Title/Abstract]         | #66 | "physical exercises"[Title/Abstract]                                                                                                                                                                                                                                                            |
|     |                                                                                                                         | #46 | "neuroblastoma"[Title/Abstract]          | #67 | "exercise training"[Title/Abstract]                                                                                                                                                                                                                                                             |
| #20 | "Neoplasms"[MeSH Terms]                                                                                                 | #47 | "rhabdomyosarcoma"[Title/Abstract]       | #68 | "exercise trainings"[Title/Abstract]                                                                                                                                                                                                                                                            |
| #21 | "oncology"[Title/Abstract]                                                                                              | #48 | "teratoma"[Title/Abstract]               | #69 | "exercise therapy"[Title/Abstract]                                                                                                                                                                                                                                                              |
| #22 | "neoplasia"[Title/Abstract]                                                                                             | #49 | "hepatoma"[Title/Abstract]               | #70 | "Aerobic Exercise"[Title/Abstract]                                                                                                                                                                                                                                                              |
| #23 | "carcinoma"[Title/Abstract]                                                                                             | #50 | "hepatoblastoma"[Title/Abstract]         | #71 | "Aerobic Exercises"[Title/Abstract]                                                                                                                                                                                                                                                             |
| #24 | "tumor"[Title/Abstract]                                                                                                 | #51 | "medulloblastoma"[Title/Abstract]        | #72 | "Exergaming"[Title/Abstract]                                                                                                                                                                                                                                                                    |
| #25 | "tumour"[Title/Abstract]                                                                                                | #52 | "PNET"[Title/Abstract]                   |     |                                                                                                                                                                                                                                                                                                 |

|     |                                                                                 |      |                                                    |      |                                                                                                                                |
|-----|---------------------------------------------------------------------------------|------|----------------------------------------------------|------|--------------------------------------------------------------------------------------------------------------------------------|
| #73 | "sport"[Title/Abstract]                                                         |      | #71 or #72 or #73 or #74 or #75 or #76             | #101 | "Single-Blind Method"[MeSH Terms]                                                                                              |
| #74 | "sports"[Title/Abstract]                                                        |      | or #77 or #78 or #79 or #80 or #81 or              | #102 | "clinical trial"[Publication Type]                                                                                             |
| #75 | "recreation"[MeSH Terms]                                                        |      | #82 or #83 or #84 or #85 or #86 or #87             | #103 | "Clin* NEAR/25 Trial*"[Title/Abstract]                                                                                         |
| #76 | "recreation therapy"[MeSH Terms]                                                | #89  | "group therapy"[MeSH Terms]                        | #104 | "Cohort Studies"[MeSH Terms]                                                                                                   |
| #77 | "physical fitness"[Title/Abstract]                                              | #90  | "group format"[MeSH Terms]                         | #105 | "Comparative Study"[MeSH Terms]                                                                                                |
| #78 | "swimming"[Title/Abstract]                                                      | #91  | "group treatment"[MeSH Terms]                      | #106 | "Cross-Sectional Studies"[MeSH Terms]                                                                                          |
| #79 | "fitness"[Title/Abstract]                                                       | #92  | "group intervention"[MeSH Terms]                   | #107 | "Non-Randomized Controlled Trials as<br>Topic"[MeSH Terms]                                                                     |
| #80 | "physical education"[Title/Abstract]                                            | #93  | "pair"[Title/Abstract]                             |      |                                                                                                                                |
| #81 | "physical training"[Title/Abstract]                                             | #94  | "pair training"[Title/Abstract]                    | #108 | "intervention study"[Title/Abstract]                                                                                           |
| #82 | "dancing"[Title/Abstract]                                                       | #95  | #89 or #90 or #91 or #92 or #93 or #94             | #109 | "intervention studies"[Title/Abstract]                                                                                         |
| #83 | "pilates"[Title/Abstract]                                                       | #96  | "randomized controlled trial"[Publication<br>Type] | #110 | "interventional study"[Title/Abstract]                                                                                         |
| #84 | "physical intervention"[Title/Abstract]                                         |      |                                                    | #111 | "interventional studies"[Title/Abstract]                                                                                       |
| #85 | "play therapy"[Title/Abstract]                                                  | #97  | "controlled clinical trial"[Publication<br>Type]   | #112 | #96 or #97 or #98 or #99 or #100 or #101<br>or #102 or #103 or #104 or #105 or #106<br>or #107 or #108 or #109 or #110 or #111 |
| #86 | "APA"[Title/Abstract]                                                           |      |                                                    |      |                                                                                                                                |
| #87 | "adapted physical<br>activities"[Title/Abstract]                                | #98  | "Randomized Controlled Trial"[MeSH<br>Terms]       | #113 | #19 and #59 and #88 and #95 and #112                                                                                           |
| #88 | #60 or #61 or #62 or #63 or #64 or #65<br>or #66 or #67 or #68 or #69 or #70 or | #99  | "Random Allocation"[MeSH Terms]                    |      |                                                                                                                                |
|     |                                                                                 | #100 | "Double-Blind Method"[MeSH Terms]                  |      |                                                                                                                                |

---
